# Supplementary material
Source: Springer Nature journal article supplement (https://www.springermedizin.de/resource/supplementary/13063_2010_559_MOESM2_ESM.pdf/9618732)

**Sample size = 750**

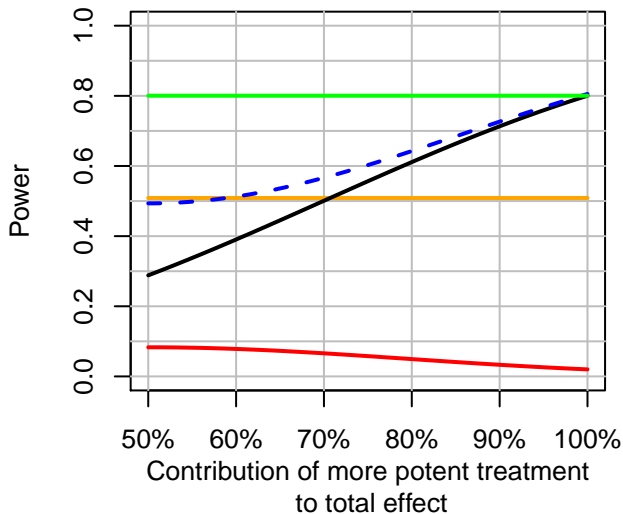

**Sample size = 750 x 2**

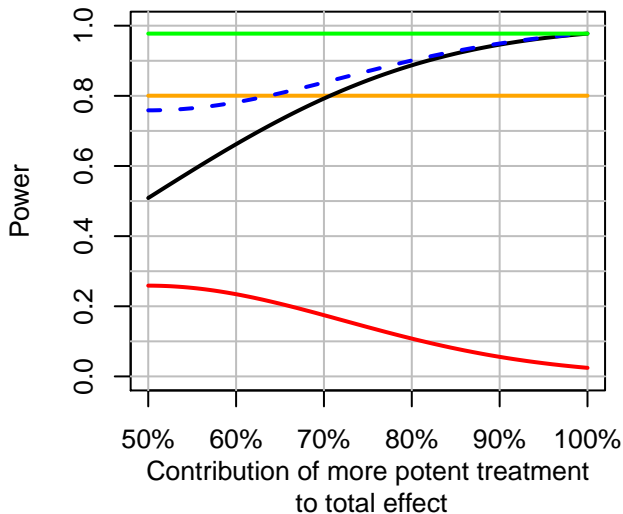

**Sample size = 750 x 4**

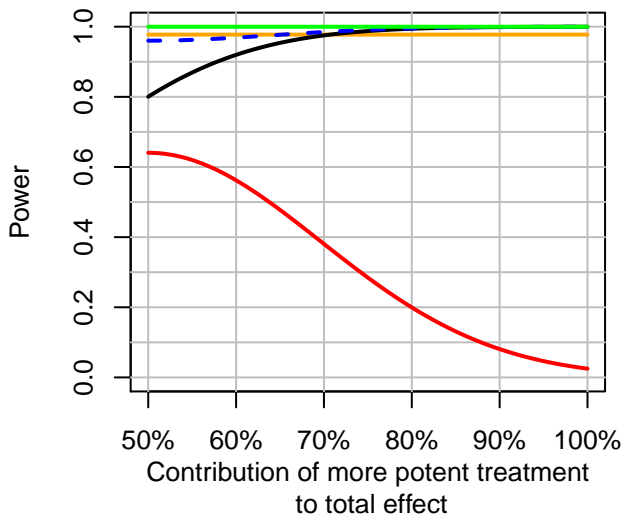

**Sample size = 750 x 8**

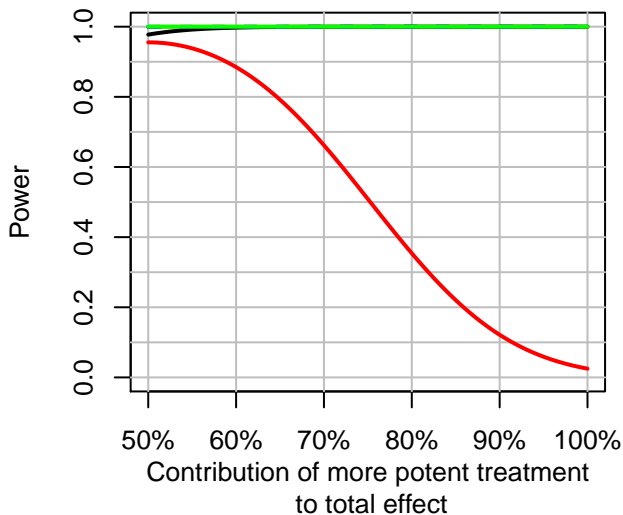

Supplement: MOESM2 [file 9618732]
